# Supplementary material for: Intrinsic setting of the exciton state in MoS2 monolayers via tailoring the Moiré correlation with a sapphire substrate
Source: Royal Society of Chemistry journal article supplement (doi:10.1039/d4nr03935a), 2025-01-01
Supplement: d4nr03935a1.pdf [file d4nr03935a1.pdf]

## (Supplementary Materials)

### Intrinsic setting of exciton state in MoS<sub>2</sub> monolayer via tailoring Moiré correlation with a sapphire substrate

Chun-Wen Chan<sup>a</sup>, Fang-Mei Chan<sup>a</sup>, Sheng-Kuei Chiu<sup>b,c</sup>, Lu-Chih Chen<sup>c</sup>, Wun-Jhen Yu<sup>a</sup>, Chia-Yun Hsieh<sup>a</sup>, Chao-Yao Yang<sup>a,d\*</sup>

<sup>a</sup>Department of Materials Science and Engineering, National Yang Ming Chiao Tung University, Hsinchu, 300093, Taiwan

<sup>b</sup>Department of Materials Science, National University of Tainan, Tainan 70005, Taiwan.

<sup>c</sup>Department of Materials Science and Engineering, Feng Chia University, Taichung City, 407102, Taiwan.

<sup>d</sup>Center for Emergent Functional Matter Science, National Yang Ming Chiao Tung University, Hsinchu 300093, Taiwan.

**Supplementary Materials 1** | Site-dependent PL spectra on an MoS<sub>2</sub> monolayer domain with  $\theta$ -dependency, which shows significant PL redshift together with intensity drop while collecting the PL spectra at the edge of the MoS<sub>2</sub> domains.

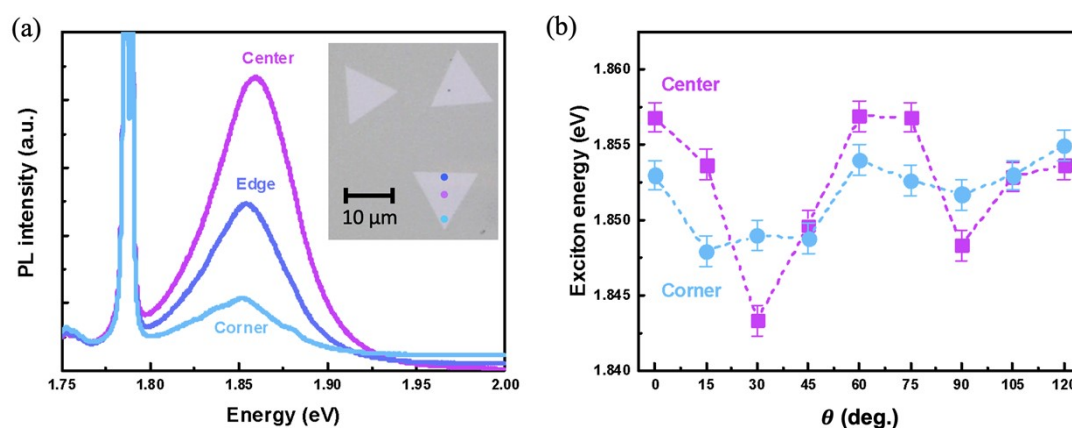

**Fig. S1** (a) Site-selected PL spectra of MoS<sub>2</sub> monolayer acquired at center (violet), edge (deep blue), and corner (blue), as highlighted in the optical image in the inset. (b) Plots of exciton energy taken at the center and corner of MoS<sub>2</sub> monolayers as a function of  $\theta$ . Note: the plots of  $\theta > 60$  deg were arbitrarily selected to extend the 6-fold periodicity.

**Supplementary Materials 2** | Conceptual demonstration for the tensile stress induced via the closely packed stack.

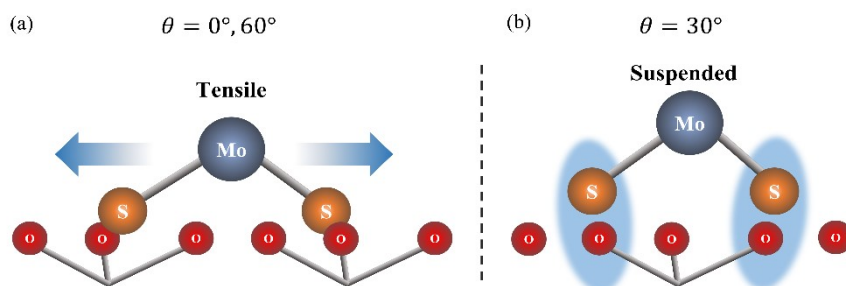

**Fig. S2** Atomic stacking configuration for the case of (a)  $\theta = 0^\circ/60^\circ$  and (b)  $\theta = 30^\circ$ . In **Fig. S2(a)**, the preferred population of S atoms at the pseudo-interstitial sites, locating at the pyramid tops formed by three O atoms, induces tensile strain in the MoS<sub>2</sub> monolayer. In contrast, in **Fig. S2(b)**, the mismatched stacking between MoS<sub>2</sub> and Al<sub>2</sub>O<sub>3</sub> may drive S atoms to primarily occupy the positions directly above O atoms, resulting in a pseudo-suspended configuration.
